# Supplementary material for: A CIBERSORTx-based immune cell scoring system could independently predict the prognosis of patients with myelodysplastic syndromes
Source: PubMed Central journal article supplement — Blood Adv. 2021 Nov 12;5(22):4535–48. doi: 10.1182/bloodadvances.2021005141 (PMC8759137; doi:10.1182/bloodadvances.2021005141), 2021-11-12

**Supplemental Table 1. Full list of 54 myeloid neoplasm-relevant genes studied in targeted NGS sequencing.**

| Gene name     | Target region (exon) | Gene name     | Target region (exon)  |
|---------------|----------------------|---------------|-----------------------|
| <i>ABL</i>    | 4-6                  | <i>JAK3</i>   | 13                    |
| <i>ASXL1</i>  | 12                   | <i>KDM6A</i>  | full                  |
| <i>ATRX</i>   | 8-10 and 17-31       | <i>KIT</i>    | 2, 8-11, 13+17        |
| <i>BCOR</i>   | full                 | <i>KRAS</i>   | 2+3                   |
| <i>BCORL1</i> | full                 | <i>MLL</i>    | 5-8                   |
| <i>BRAF</i>   | 15                   | <i>MPL</i>    | 10                    |
| <i>CALR</i>   | 9                    | <i>MYD88</i>  | 3-5                   |
| <i>CBL</i>    | 8+9                  | <i>NOTCH1</i> | 26-28, 34             |
| <i>CBLB</i>   | 9, 10                | <i>NPM1</i>   | 12                    |
| <i>CBLC</i>   | 9, 10                | <i>NRAS</i>   | 2+3                   |
| <i>CDKN2A</i> | full                 | <i>PDGFRA</i> | 12, 14, 18            |
| <i>CEBPA</i>  | full                 | <i>PHF6</i>   | full                  |
| <i>CSF3R</i>  | 14-17                | <i>PTEN</i>   | 5+7                   |
| <i>CUX1</i>   | full                 | <i>PTPN11</i> | 3+13                  |
| <i>DNMT3A</i> | full                 | <i>RAD21</i>  | full                  |
| <i>ETV6</i>   | full                 | <i>RUNX1</i>  | full                  |
| <i>EZH2</i>   | full                 | <i>SETBP1</i> | 4 (partial)           |
| <i>FBXW7</i>  | 9+10+11              | <i>SF3B1</i>  | 13-16                 |
| <i>FLT3</i>   | 14+15+20             | <i>SMC1A</i>  | 2, 11, 16+17          |
| <i>GATA1</i>  | 2                    | <i>SMC3</i>   | 10, 13, 19, 23, 25+28 |
| <i>GATA2</i>  | 2-6                  | <i>SRSF2</i>  | 1                     |
| <i>GNAS</i>   | 8+9                  | <i>STAG2</i>  | full                  |
| <i>HRAS</i>   | 2+3                  | <i>TET2</i>   | 3-11                  |
| <i>IDH1</i>   | 4                    | <i>TP53</i>   | 2-11                  |
| <i>IDH2</i>   | 4                    | <i>U2AF1</i>  | 2+6                   |
| <i>IKZF1</i>  | full                 | <i>WT1</i>    | 7+9                   |
| <i>JAK2</i>   | 12+14                | <i>ZRSR2</i>  | full                  |

**Supplemental Table 2. Univariate analysis (Cox regression) of the impact of different immune cell fractions on the overall survival in the 316 MDS patients**

| Cell composition (%)         | Hazard ratio | 95% confidence interval |        | P value |
|------------------------------|--------------|-------------------------|--------|---------|
|                              |              | Lower                   | Higher |         |
| Mast cells resting           | 1.075        | 0.987                   | 1.17   | 0.099   |
| Macrophages M2               | 1.071        | 1.015                   | 1.13   | 0.012   |
| T cells CD4 memory resting   | 1.064        | 0.996                   | 1.137  | 0.065   |
| T cells CD4 naive            | 1.058        | 0.991                   | 1.13   | 0.092   |
| B cells memory               | 1.057        | 0.98                    | 1.139  | 0.151   |
| Eosinophils                  | 1.048        | 1.012                   | 1.086  | 0.009   |
| Plasma cells                 | 1.039        | 0.999                   | 1.08   | 0.055   |
| B cells naive                | 1.027        | 0.986                   | 1.07   | 0.199   |
| Neutrophils                  | 1.021        | 0.999                   | 1.045  | 0.065   |
| NK cells resting             | 1.011        | 0.983                   | 1.04   | 0.451   |
| Mast cells activated         | 1.009        | 0.985                   | 1.034  | 0.467   |
| T cells gamma delta          | 1.004        | 0.719                   | 1.402  | 0.982   |
| Dendritic cells activated    | 0.999        | 0.93                    | 1.073  | 0.982   |
| Monocytes                    | 0.997        | 0.983                   | 1.012  | 0.700   |
| T cells CD4 memory activated | 0.997        | 0.936                   | 1.061  | 0.919   |
| T cells CD8                  | 0.993        | 0.972                   | 1.015  | 0.538   |
| Macrophages M1               | 0.983        | 0.579                   | 1.668  | 0.948   |
| T cells regulatory (Tregs)   | 0.976        | 0.886                   | 1.076  | 0.630   |
| Macrophages M0               | 0.962        | 0.946                   | 0.978  | <0.001  |
| T cells follicular helper    | 0.868        | 0.739                   | 1.02   | 0.086   |
| Dendritic cells resting      | 0.828        | 0.432                   | 1.588  | 0.570   |
| NK cells activated           | 0.767        | 0.224                   | 2.631  | 0.674   |

P values of <0.05 are statistically significant.

**Supplemental Table 3. Cox regression of the impact of immune-cell scores on the overall survival of 316 MDS patients**

| <b>Variable (reference: score 0*)</b> | <b>HR</b> | <b>Lower 95% CI</b> | <b>Upper 95% CI</b> | <b>P value</b> |
|---------------------------------------|-----------|---------------------|---------------------|----------------|
| Score 1                               | 1.161     | 0.692               | 1.945               | 0.572          |
| Score 2                               | 1.964     | 1.201               | 3.213               | 0.007          |
| Score 3                               | 4.062     | 2.168               | 7.609               | <0.001         |
| <b>Variable (reference: score 1)</b>  | <b>HR</b> | <b>Lower 95% CI</b> | <b>Upper 95% CI</b> | <b>P value</b> |
| Score 2                               | 1.707     | 1.145               | 2.543               | 0.009          |
| Score 3                               | 3.578     | 2.046               | 6.259               | <0.001         |
| <b>Variable (reference: score 2)</b>  | <b>HR</b> | <b>Lower 95% CI</b> | <b>Upper 95% CI</b> | <b>P value</b> |
| Score 3                               | 2.082     | 1.220               | 3.555               | 0.007          |

*P* values of <0.05 are statistically significant.

\*Patients got one point if they had each one of the following: lower M0, higher M2, or higher eosinophils. The immune-cell score (from 0 to 3) of a patient was the sum of points he/she got from each of the three cell populations

Abbreviations: HR, Hazard ratios; CI, confidence interval.

**Supplemental Table 4. Comparison of cytogenetic changes among 307 MDS patients in different risk groups based on the immune-cell scoring system**

| Variables                              | Total<br>(n=307) | Low-risk<br>(n=174) | Intermediate-risk<br>(n=111) | High-risk<br>(n=22) | <i>P</i> value |
|----------------------------------------|------------------|---------------------|------------------------------|---------------------|----------------|
| <b>Normal karyotype</b>                | 171 (55.7)       | 101 (58.0)          | 61 (55.0)                    | 9 (40.9)            | 0.307          |
| <b>Any abnormality</b>                 | 136 (44.3)       | 73 (42.0)           | 50 (45.0)                    | 13 (59.1)           |                |
| <b>Loss Y*</b>                         | 11 (3.6)         | 9 (5.2)             | 1 (0.9)                      | 1 (4.5)             | 0.162          |
| <b>Del 20q*</b>                        | 14 (4.6)         | 8 (4.6)             | 6 (5.4)                      | 0 (0)               | 0.540          |
| <b>Trisomy 8*</b>                      | 24 (7.8)         | 16 (9.2)            | 5 (4.5)                      | 3 (13.6)            | 0.204          |
| <b>Del 5q*</b>                         | 2 (0.7)          | 1 (0.6)             | 1 (0.9)                      | 0 (0)               | 0.875          |
| <b>Poor risk karyotype<sup>†</sup></b> | 45 (14.7)        | 17 (9.8)            | 23 (20.7)                    | 5 (22.7)            | 0.021          |
| <b>Monosomy 7*</b>                     | 9 (2.9)          | 3 (1.7)             | 4 (3.6)                      | 2 (9.1)             | 0.135          |
| <b>Complex karyotype</b>               | 36 (11.7)        | 15 (8.6)            | 18 (16.2)                    | 3 (13.6)            | 0.145          |
| <b>Other abnormalities</b>             | 40 (13.0)        | 21 (12.1)           | 15 (13.5)                    | 4 (18.2)            | 0.712          |

\*As the sole abnormality.

<sup>†</sup>Good: normal karyotype, isolated -Y, del(5q) or del(20q); Poor: complex ( $\geq 3$  abnormalities) or chromosome 7 anomalies; Intermediate: other abnormalities.

**Supplemental Table 5. Comparison of genetic alterations among 302 patients in different risk groups based on the immune-cell scoring system**

| Genes           | Total (n=302) | Low-risk (n=174) | Intermediate-risk (n=106) | High-risk (n=22) | P value |
|-----------------|---------------|------------------|---------------------------|------------------|---------|
| <i>ASXL1</i>    | 68 (22.5)     | 36 (20.7)        | 27 (25.5)                 | 5 (22.7)         | 0.649   |
| <i>BCOR</i>     | 13 (4.3)      | 7 (4.0)          | 4 (3.8)                   | 2 (9.1)          | 0.514   |
| <i>CALR</i>     | 1 (0.3)       | 1 (0.6)          | 0                         | 0                | 0.691   |
| <i>CBL</i>      | 6 (2.0)       | 2 (1.1)          | 3 (2.8)                   | 1 (4.5)          | 0.416   |
| <i>CEBPA</i>    | 10 (3.3)      | 7 (4.0)          | 2 (1.9)                   | 1 (4.5)          | 0.591   |
| <i>CUX1</i>     | 2 (0.7)       | 2 (1.1)          | 0                         | 0                | 0.477   |
| <i>DNMT3A</i>   | 26 (8.6)      | 14 (8.0)         | 9 (8.5)                   | 3 (13.6)         | 0.677   |
| <i>ETV6</i>     | 5 (1.7)       | 3 (1.7)          | 2 (1.9)                   | 0                | 0.815   |
| <i>EZH2</i>     | 23 (7.6)      | 12 (6.9)         | 10 (9.4)                  | 1 (4.5)          | 0.631   |
| <i>FLT3-ITD</i> | 1 (0.3)       | 1 (0.6)          | 0                         | 0                | 0.691   |
| <i>GATA2</i>    | 4 (1.3)       | 4 (2.3)          | 0                         | 0                | 0.225   |
| <i>GNAS</i>     | 2 (0.7)       | 1 (0.6)          | 1 (0.9)                   | 0                | 0.863   |
| <i>IDH1</i>     | 3 (1.0)       | 0                | 3 (2.8)                   | 0                | 0.061   |
| <i>IDH2</i>     | 12 (4.0)      | 5 (2.9)          | 7 (6.6)                   | 0                | 0.184   |
| <i>IKZF1</i>    | 1 (0.3)       | 0                | 1 (0.9)                   | 0                | 0.396   |
| <i>JAK2</i>     | 2 (0.7)       | 0                | 2 (1.9)                   | 0                | 0.155   |
| <i>KIT</i>      | 4 (1.3)       | 1 (0.6)          | 3 (2.8)                   | 0                | 0.237   |
| <i>KRAS</i>     | 6 (2.0)       | 5 (2.9)          | 1 (0.9)                   | 0                | 0.419   |
| <i>MLL</i>      | 5 (1.7)       | 2 (1.1)          | 3 (2.8)                   | 0                | 0.462   |
| <i>MPL</i>      | 2 (0.7)       | 2 (1.1)          | 0                         | 0                | 0.477   |
| <i>NOTCH1</i>   | 1 (0.3)       | 1 (0.6)          | 0                         | 0                | 0.691   |
| <i>NPM1</i>     | 12 (4.0)      | 3 (1.7)          | 6 (5.7)                   | 3 (13.6)         | 0.014   |
| <i>NRAS</i>     | 16 (5.3)      | 5 (2.9)          | 10 (9.4)                  | 1 (4.5)          | 0.059   |
| <i>PHF6</i>     | 6 (2.0)       | 3 (1.7)          | 2 (1.9)                   | 1 (4.5)          | 0.668   |
| <i>PTPN11</i>   | 1 (0.3)       | 1 (0.6)          | 0                         | 0                | 0.691   |
| <i>RAD21</i>    | 3 (1.0)       | 1 (0.6)          | 1 (0.9)                   | 1 (4.5)          | 0.209   |
| <i>RUNX1</i>    | 52 (17.2)     | 27 (15.5)        | 21 (19.8)                 | 4 (18.2)         | 0.648   |
| <i>SETBP1</i>   | 8 (2.6)       | 6 (3.4)          | 2 (1.9)                   | 0                | 0.530   |
| <i>SF3B1</i>    | 42 (13.9)     | 32 (18.4)        | 10 (9.4)                  | 0                | 0.016   |
| <i>SMC1A</i>    | 2 (0.7)       | 2 (1.1)          | 0                         | 0                | 0.477   |
| <i>SRSF2</i>    | 30 (9.9)      | 16 (9.2)         | 12 (11.3)                 | 2 (9.1)          | 0.839   |
| <i>STAG1</i>    | 2 (0.7)       | 1 (0.6)          | 1 (0.9)                   | 0                | 0.863   |
| <i>STAG2</i>    | 30 (9.9)      | 15 (8.6)         | 13 (12.3)                 | 2 (9.1)          | 0.608   |
| <i>TET2</i>     | 44 (14.6)     | 28 (16.1)        | 12 (11.3)                 | 4 (18.2)         | 0.483   |
| <i>TP53</i>     | 39 (12.9)     | 17 (9.8)         | 15 (14.2)                 | 7 (31.8)         | 0.013   |
| <i>U2AF1</i>    | 23 (7.6)      | 14 (8.0)         | 8 (7.5)                   | 1 (4.5)          | 0.843   |
| <i>WT1</i>      | 2 (0.7)       | 0                | 1 (0.9)                   | 1 (4.5)          | 0.042   |
| <i>ZRSR2</i>    | 20 (6.6)      | 12 (6.9)         | 7 (6.6)                   | 1 (4.5)          | 0.916   |

Data are presented as median [range] or n (%).

P values of <0.05 are statistically significant.

**Supplemental Table 6. Univariate analysis (Cox regression) of the impact of different variables on the overall survival of 316 MDS patients**

| Variable                           | HR    | Lower 95% CI | Upper 95% CI | P value |
|------------------------------------|-------|--------------|--------------|---------|
| Age*                               | 1.024 | 1.012        | 1.036        | <0.001  |
| IPSS-R <sup>†, ‡</sup>             | 1.873 | 1.600        | 2.193        | <0.001  |
| ICSS <sup>§</sup>                  | 1.430 | 1.232        | 1.660        | <0.001  |
| <b>Gene alteration<sup>¶</sup></b> |       |              |              |         |
| <i>ASXL1</i>                       | 1.445 | 0.979        | 2.132        | 0.064   |
| <i>BCOR</i>                        | 0.421 | 0.134        | 1.323        | 0.138   |
| <i>CALR</i>                        | 0.049 | <0.001       | 978.7        | 0.551   |
| <i>CBL</i>                         | 2.183 | 0.805        | 5.923        | 0.125   |
| <i>CEBPA</i>                       | 1.803 | 0.792        | 4.102        | 0.160   |
| <i>CUX1</i>                        | 0.049 | <0.001       | 1054         | 0.554   |
| <i>DNMT3A</i>                      | 1.327 | 0.762        | 2.310        | 0.318   |
| <i>ETV6</i>                        | 1.160 | 0.368        | 3.652        | 0.800   |
| <i>EZH2</i>                        | 2.539 | 1.470        | 4.386        | <0.001  |
| <i>FLT3-ITD</i>                    | 2.937 | 0.408        | 21.13        | 0.285   |
| <i>GATA2</i>                       | 0.048 | <0.001       | 50.14        | 0.392   |
| <i>GNAS</i>                        | 0.523 | 0.064        | 4.252        | 0.544   |
| <i>IDH1</i>                        | 0.049 | <0.001       | 626.2        | 0.532   |
| <i>IDH2</i>                        | 0.838 | 0.342        | 2.052        | 0.700   |
| <i>IKZF1</i>                       | 1.825 | 0.254        | 13.09        | 0.550   |
| <i>JAK2</i>                        | 19.23 | 4.568        | 80.94        | <0.001  |
| <i>KIT</i>                         | 1.434 | 0.354        | 5.803        | 0.614   |
| <i>KRAS</i>                        | 1.137 | 0.361        | 3.578        | 0.826   |
| <i>MLL</i>                         | 1.274 | 0.405        | 4.012        | 0.679   |
| <i>MPL</i>                         | 0.038 | <0.001       | 18.52        | 0.300   |
| <i>NOTCH1</i>                      | 0.049 | <0.001       | 376413       | 0.710   |
| <i>NPM1</i>                        | 1.716 | 0.799        | 3.684        | 0.166   |
| <i>NRAS</i>                        | 1.453 | 0.761        | 2.773        | 0.258   |
| <i>PHF6</i>                        | 1.566 | 0.578        | 4.245        | 0.378   |
| <i>PTPN11</i>                      | 1.611 | 0.225        | 11.55        | 0.635   |
| <i>RAD21</i>                       | 3.418 | 0.837        | 13.96        | 0.087   |
| <i>RUNX1</i>                       | 1.695 | 1.124        | 2.554        | 0.012   |
| <i>SETBP1</i>                      | 1.580 | 0.696        | 3.587        | 0.274   |
| <i>SF3B1</i>                       | 0.293 | 0.143        | 0.599        | 0.001   |
| <i>SMC1A</i>                       | 1.574 | 0.219        | 11.32        | 0.652   |
| <i>SRSF2</i>                       | 1.424 | 0.875        | 2.319        | 0.155   |
| <i>STAG1</i>                       | 0.755 | 0.105        | 5.410        | 0.780   |
| <i>STAG2</i>                       | 1.767 | 1.085        | 2.876        | 0.022   |
| <i>TET2</i>                        | 1.406 | 0.896        | 2.208        | 0.139   |
| <i>TP53</i>                        | 5.812 | 3.812        | 8.861        | <0.001  |
| <i>U2AF1</i>                       | 0.848 | 0.445        | 1.617        | 0.617   |

|              |       |        |       |       |
|--------------|-------|--------|-------|-------|
| <b>WT1</b>   | 0.049 | <0.001 | 107.4 | 0.442 |
| <b>ZRSR2</b> | 1.486 | 0.801  | 2.757 | 0.210 |

Abbreviations: HR, Hazard ratios; CI, confidence interval.

P values of <0.05 are statistically significant.

\*Age, as a continuous variable analysis.

†IPSS-R risk groups: Very good, good, intermediate, poor, very poor

‡307 patients had cytogenetic data at diagnosis

§immune-cell scoring system: low, intermediate, high

¶302 patients had gene mutation data at diagnosis

**Supplemental Table 7. Relevant genes that are differentially expressed in nuclear factor kappa B signaling (NF-κB) signaling, oxidative stress response and the core enriched HSC/leukemic stem cells (CE-HSC/LSC) signatures.**

|                                  |                |               |                 |                 |
|----------------------------------|----------------|---------------|-----------------|-----------------|
| <b>NF-κB signaling</b>           | <i>ATF3</i>    | <i>CXCL8</i>  | <i>IGFBP3</i>   | <i>PTGER4</i>   |
|                                  | <i>ATP2B1</i>  | <i>DNAJB4</i> | <i>IL1B</i>     | <i>SERPINE1</i> |
|                                  | <i>BHLHE40</i> | <i>DUSP2</i>  | <i>IL23A</i>    | <i>TGIF1</i>    |
|                                  | <i>BIRC3</i>   | <i>DUSP5</i>  | <i>JAG1</i>     | <i>THBS1</i>    |
|                                  | <i>CCL4</i>    | <i>EGR1</i>   | <i>JUN</i>      | <i>TNF</i>      |
|                                  | <i>CCL5</i>    | <i>EGR2</i>   | <i>MAFF</i>     | <i>TNFAIP3</i>  |
|                                  | <i>CD69</i>    | <i>EGR3</i>   | <i>MSC</i>      | <i>TNFSF9</i>   |
|                                  | <i>CD83</i>    | <i>FOSB</i>   | <i>NFKBIA</i>   | <i>TSC22D1</i>  |
|                                  | <i>CXCL2</i>   | <i>GPR183</i> | <i>NR4A1</i>    | <i>ZBTB10</i>   |
|                                  | <i>CXCL3</i>   | <i>IER5</i>   | <i>PDE4B</i>    | <i>ZFP36</i>    |
| <b>Oxidative stress response</b> | <i>BCL2</i>    | <i>CDKN1A</i> | <i>HMOX1</i>    | <i>NQO1</i>     |
|                                  | <i>C1QA</i>    | <i>CDKN1C</i> | <i>HSPA1B</i>   | <i>TNF</i>      |
|                                  | <i>C1S</i>     | <i>CYCS</i>   | <i>JUN</i>      | <i>TRAF1</i>    |
|                                  | <i>C2</i>      | <i>DDIT3</i>  | <i>MAP3K9</i>   |                 |
|                                  | <i>C5</i>      | <i>EGR1</i>   | <i>NFKBIE</i>   |                 |
| <b>CE-HSC/LSC</b>                | <i>ABCB1</i>   | <i>GCNT2</i>  | <i>MSI2</i>     | <i>RUNX2</i>    |
|                                  | <i>BAALC</i>   | <i>GNL1</i>   | <i>MSMO1</i>    | <i>SEL1L3</i>   |
|                                  | <i>BCL11A</i>  | <i>HOPX</i>   | <i>MYO5C</i>    | <i>SLC17A9</i>  |
|                                  | <i>BTBD11</i>  | <i>HOXB2</i>  | <i>NPR3</i>     | <i>SLC25A36</i> |
|                                  | <i>CALN1</i>   | <i>HOXB3</i>  | <i>PNP</i>      | <i>SMARCA2</i>  |
|                                  | <i>CD109</i>   | <i>INPP4B</i> | <i>PPP1R16B</i> | <i>SOCS2</i>    |
|                                  | <i>CFH</i>     | <i>INSIG1</i> | <i>PRKCH</i>    | <i>TCEAL9</i>   |
|                                  | <i>COL5A1</i>  | <i>IPO11</i>  | <i>PROM1</i>    | <i>TCF12</i>    |
|                                  | <i>CRHBP</i>   | <i>JUN</i>    | <i>PTK2</i>     | <i>TFPI</i>     |
|                                  | <i>DST</i>     | <i>KBTBD8</i> | <i>RBPMS</i>    | <i>ZBTB4</i>    |
|                                  | <i>DUSP6</i>   | <i>KMT2A</i>  | <i>RIMKLB</i>   | <i>ZDHHC21</i>  |
|                                  | <i>ELK3</i>    | <i>LPP</i>    | <i>RLIM</i>     | <i>ZNF165</i>   |
|                                  | <i>FLT3</i>    | <i>MEIS1</i>  | <i>RNF125</i>   |                 |
|                                  | <i>FOXO1</i>   | <i>MLLT3</i>  | <i>RSL1D1</i>   |                 |



**Supplemental Figure 1. Kaplan-Meier survival curves stratified by immune-cell scoring system (ICSS) in patients with normal karyotype and those without poor-risk karyotypes** Outcome of the 307 patients who had cytogenetic data at diagnosis. (a) LFS and (b) OS of patients with normal karyotype; and (c) LFS and (d) OS of patients without poor-risk karyotypes. ICSS could well risk-stratify patients in either group irrespective of karyotypes.

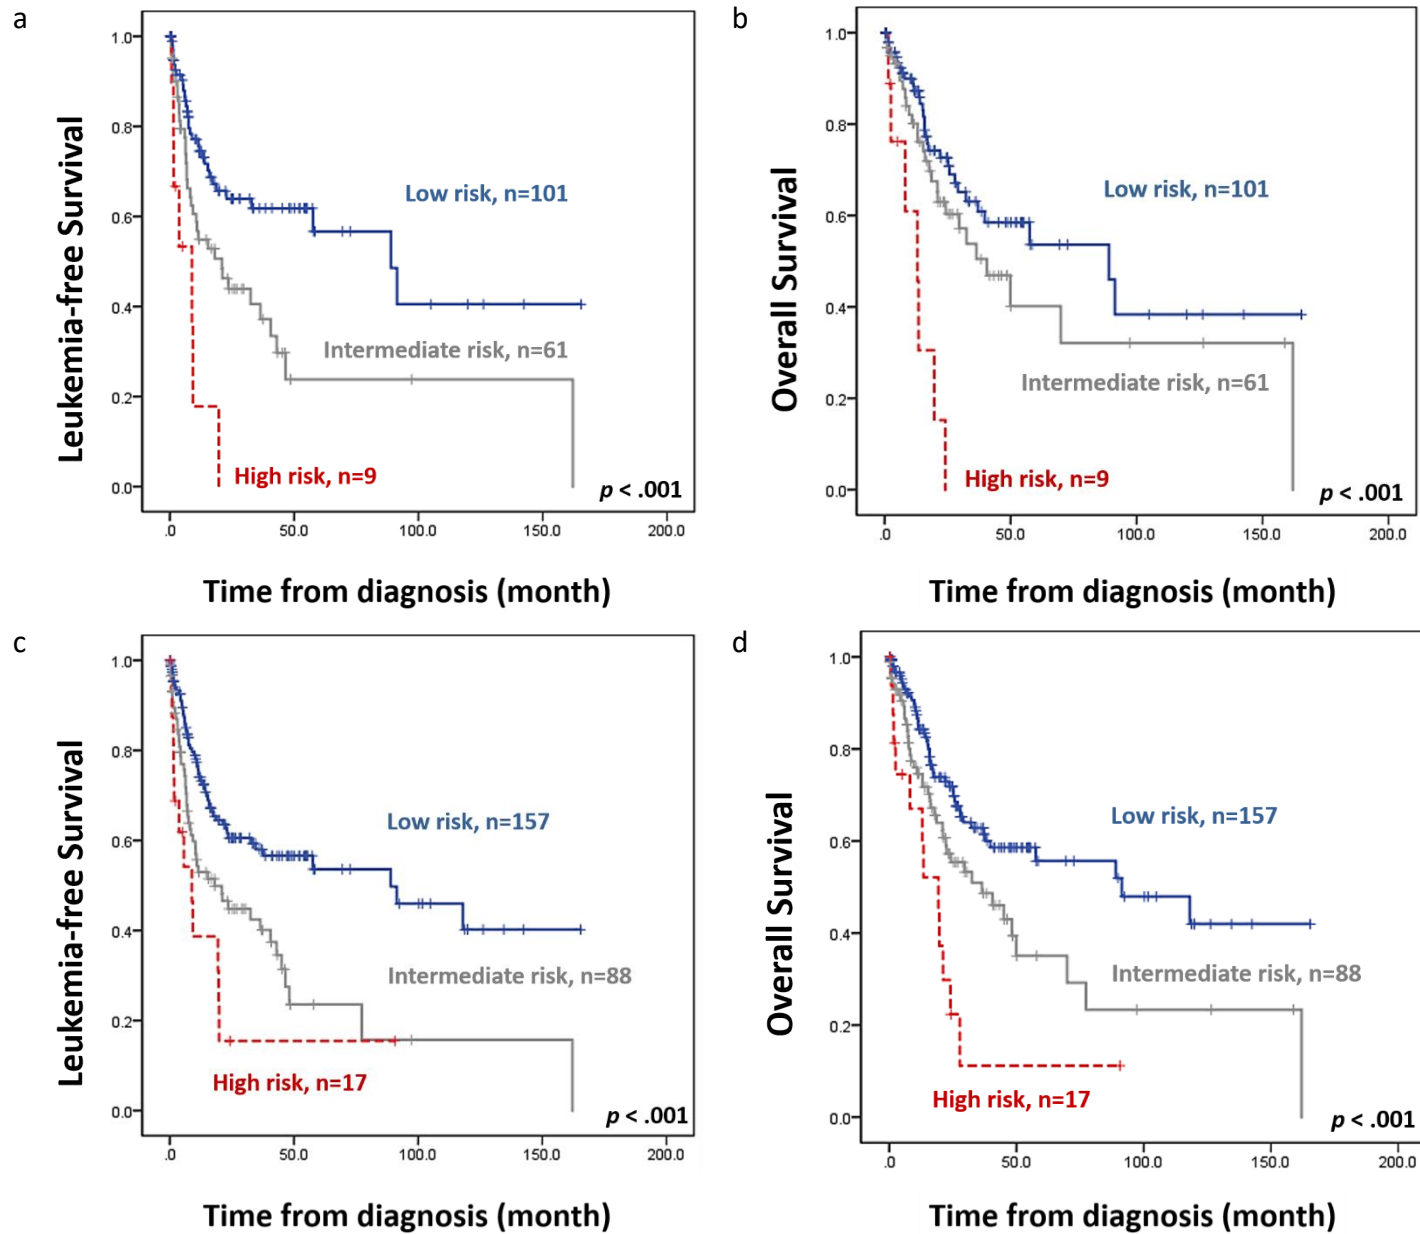

**Supplemental Figure 2. Kaplan-Meier survival curves stratified by ICSS in patients treated with different modalities.**

(a) LFS and (b) OS of 162 patients who received supportive care; and (c) LFS and (d) OS of patients who received active treatment. ICSS could well risk-stratify patients in either group.

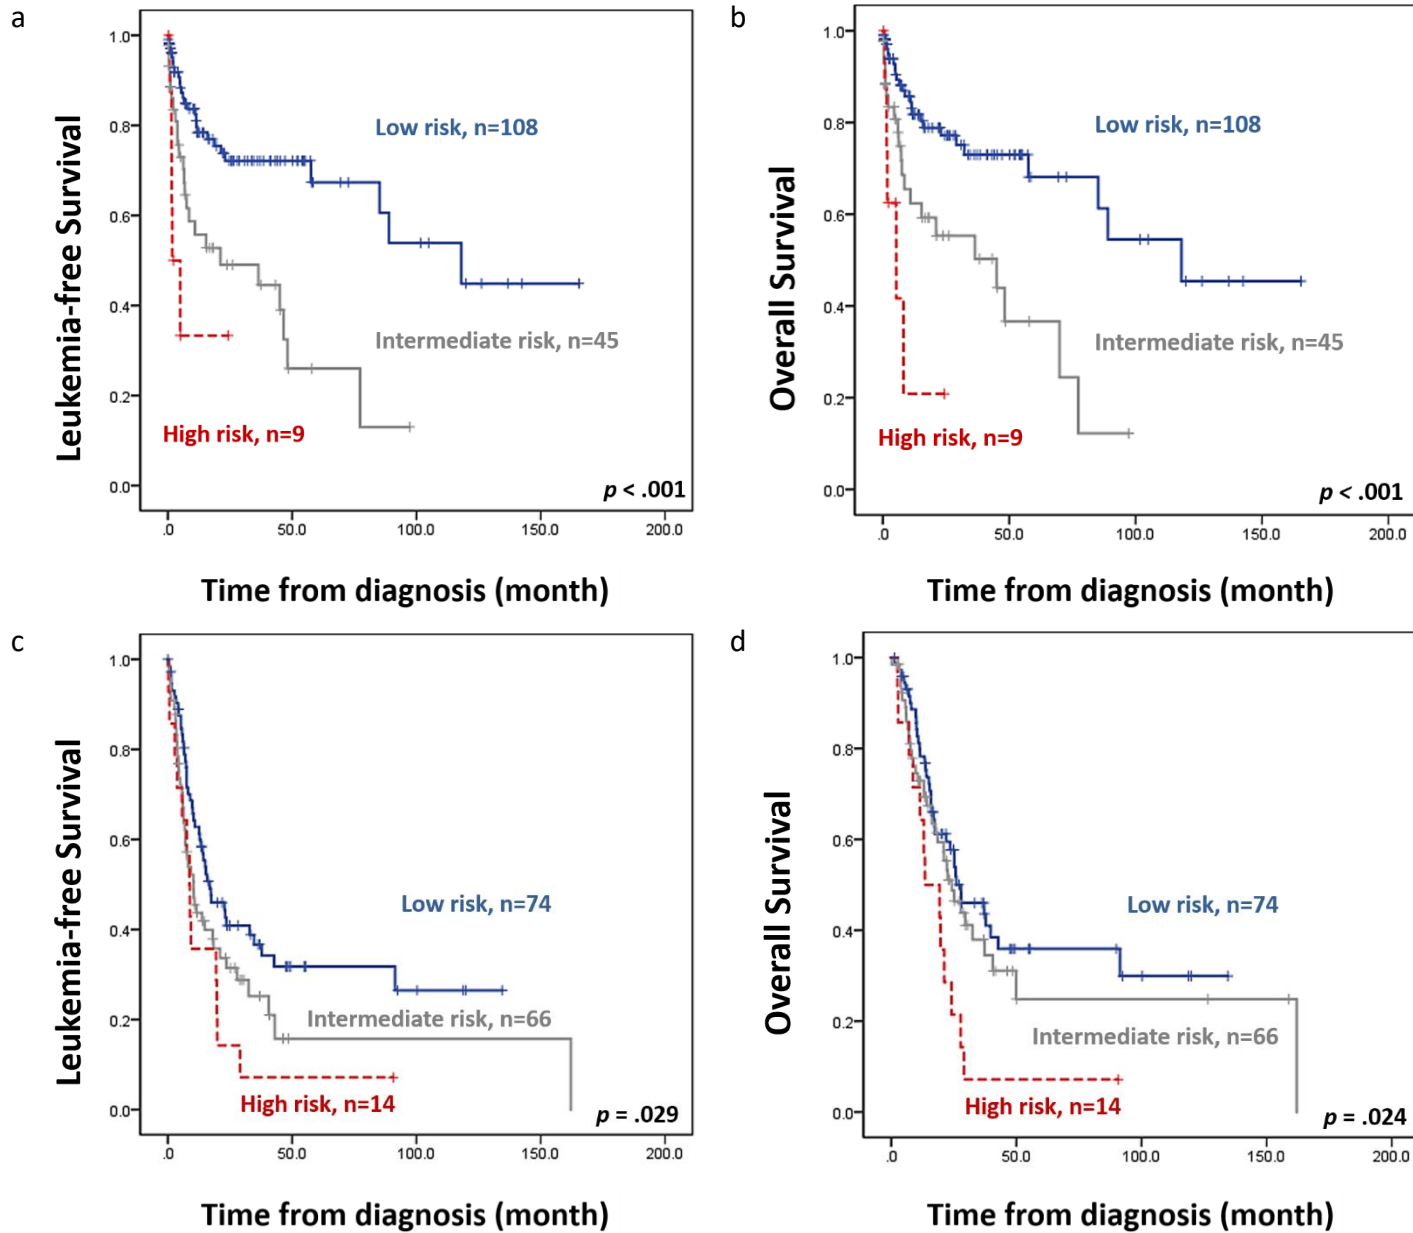

**Supplemental Figure 3. Kaplan-Meier survival curves of patients receiving hypomethylation agents (HMA) and hematopoietic stem cell transplant (HSCT).**

(a) LFS and (b) OS of 115 patients who received HMA. The detrimental effect of higher immune-cell scores was alleviated in these patients. (c) LFS and (d) OS of 47 patients who underwent HSCT.

The difference in survival was diminished between patients with variable immune-cell scores.

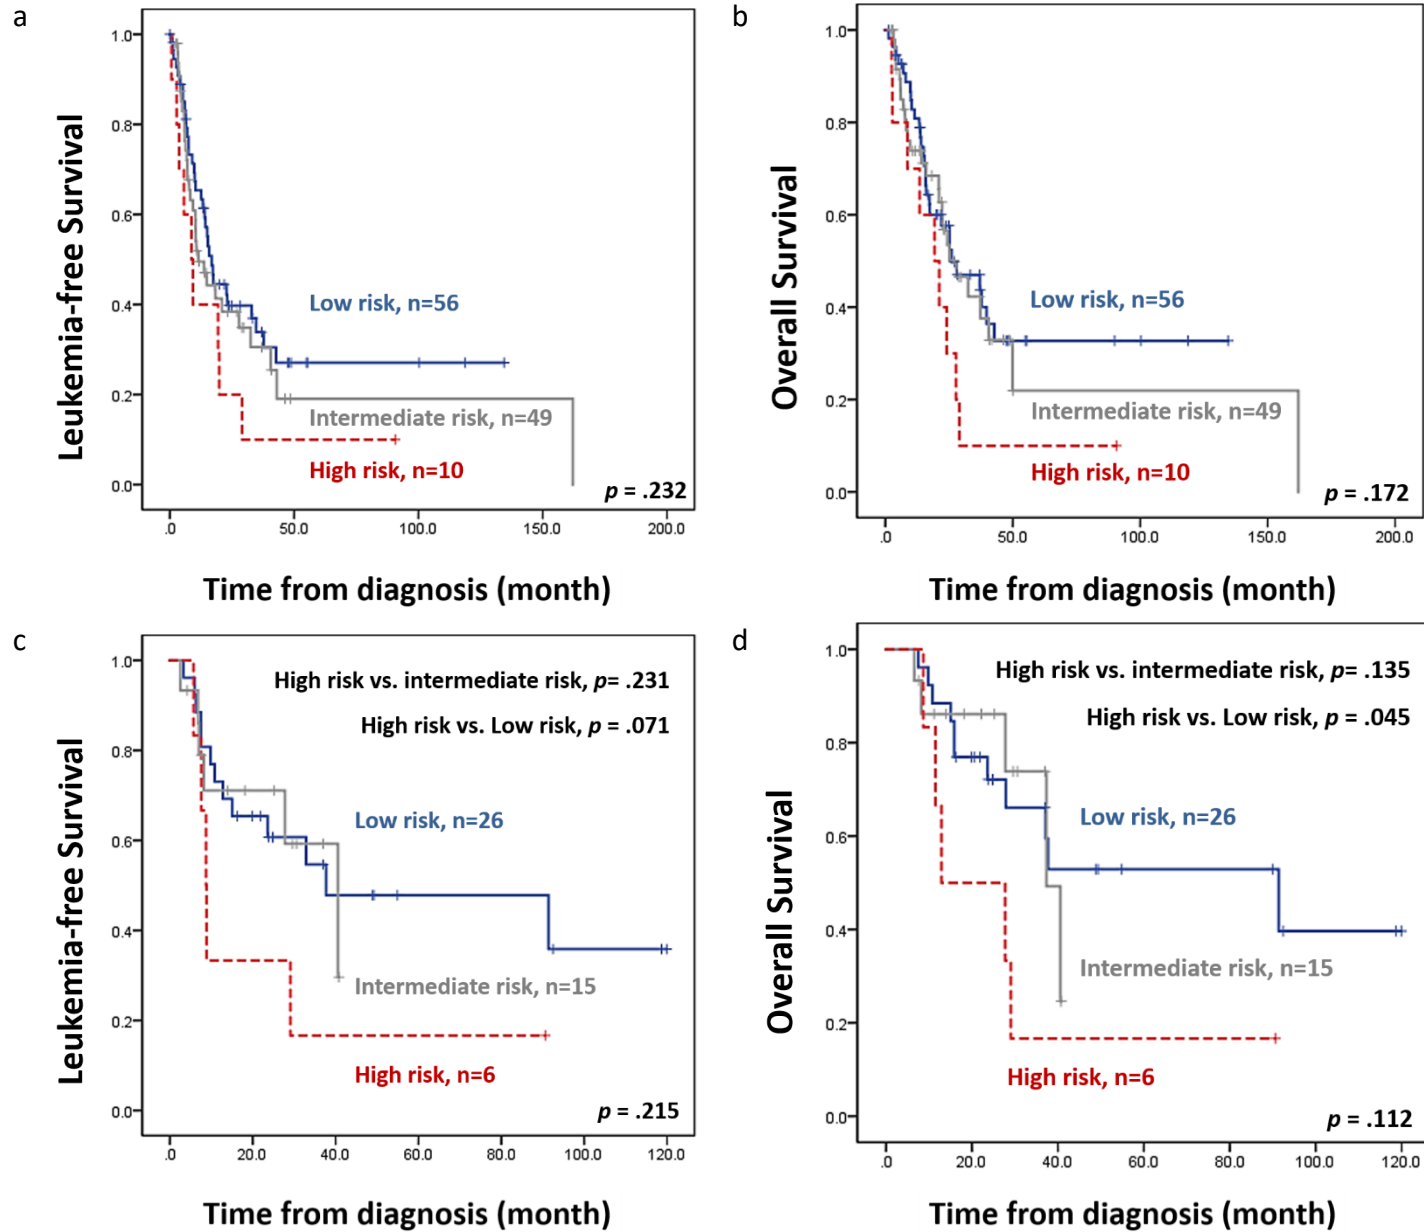

Supplement: advancesADV2021005141-suppl1.pdf [file advancesADV2021005141-suppl1.pdf]
